# Supplementary material
Source: publisher site journal article supplement (https://static.cambridge.org/content/id/urn:cambridge.org:id:article:S1041610206004443/resource/name/IPG_McAiney_Supplementary_Material.doc)
Supplement: Supplementary file 1 [file IPG_McAiney_Supplementary_Material.doc]

**ON-LINE SUPPLEMENT TO:**

**EVALUATION OF THE SUSTAINED IMPLEMENTATION OF A MENTAL HEALTH LEARNING INITIATIVE IN LONG-TERM CARE**

Carrie A. McAiney, Ph.D.,[[1]](#footnote-2),[[2]](#footnote-3) Paul Stolee, Ph.D.,[[3]](#footnote-4),[[4]](#footnote-5), Loretta M. Hillier, M.A.,[[5]](#footnote-6),[[6]](#footnote-7) Diane Harris, RN, MS, CHRD, CPT[[7]](#footnote-8), Pam Hamilton, B.A.,[[8]](#footnote-9),[[9]](#footnote-10) Linda Kessler, R.N., MHSc.,7 Victoria Madsen, M.A.,2 and J. Kenneth Le Clair, M.D.7,8,

Address correspondence to: Dr. Carrie A. McAiney, McMaster-Geriatric Psychiatry, St. Joseph’s Healthcare, CMHS, 100 West 5th St., Hamilton, Ontario, L8N 3K7; Phone: (905) 522-1155, Ext. 6722; Fax: (905) 575-3778; email: mcaineyc@mcmaster.ca.

**___________________________________________________________________________**

**Introduction:** The “Putting the P.I.E.C.E.S. Together” learning initiative has evolved (and continues to evolve) as our understanding increases about learning, knowledge transfer, and interdisciplinary collaborative care. This document represents the most recent thinking related to the P.I.E.C.E.S. learning initiative. For up-to-date information on the initiative visit: [www.piecescanada.com](http://www.piecescanada.com/)

## Introduction

The P.I.E.C.E.S. learning and development strategy complements and provides a framework to integrate other educational programs and relevant bodies of knowledge. The framework enables a comprehensive interdisciplinary approach that builds on knowledge and skills from a variety of sources and programs.

Over time the P.I.E.C.E.S. framework, tools, and learning strategies will change in response to the evolving needs of those we serve; it will also change in response to new knowledge and partnerships with other initiatives and education. Shifts will also depend on development in field to enable ongoing improvements within teams, organizations, and across the system.

## Background

The foundation for a common vision, a common language, and common approach to the care of older people in the long-term care sector in the Province of Ontario, Canada has been achieved through the development of a comprehensive, system-wide approach to education on the core competencies and best practices for dementia and mental health care.

The Ontario Government’s learning strategy entitled "Putting the P.I.E.C.E.S. Together", was originally designed through multi-stakeholder consultations to enhance the ability of Long-Term Care home staff to meet the care requirements of individuals with increasingly complex physical and cognitive/mental health needs and associated behavioural issues.

Experiences and evaluations with the P.I.E.C.E.S. education program over a decade have informed the design of support structures for the ongoing development of the learners (participants) and complimentary programs for the LTC community, acute care and emergency departments, and family physicians.

## **What is P.I.E.C.E.S.?**

***A practical, effective approach to change and continuous improvement.***

P.I.E.C.E.S. is a best practice learning and development initiative that provides an approach to understanding and enhancing care for individuals with complex cognitive and mental health needs; it is an effective approach that allows continuing improved shared care practices through human resource development and changes in practice.

P.I.E.C.E.S. provides a systematic approach to the common issues, diagnosis and challenges of the older person at risk including those with aggressive behaviour. P.I.E.C.E.S. offers a practical framework for assessment and supportive care strategies using a comprehensive interdisciplinary client-centred approach. Also included in the approach is a practical tool that promotes team dialogue and shared-problem solving.

**P.I.E.C.E.S.** conveys the individuality and importance of the various factors in the well-being, self-determination, and quality of life of the older person and his or her caregivers. P.I.E.C.E.S. provides a framework for understanding the often multiple causes as to why a person behaves the way he or she does and what resources are available to build on.

- The first three letters **P-I-E,** represent an individual's **P**hysical, **I**ntellectual, and **E**motional health.
- The **C is** the centre-piece or focus in care, i.e., maximizing **C**apabilities which promotes the achievement of the highest quality of life as possible for an individual.
- The **E-S** represent the environment that an individual interacts with (physical as well as the emotional environment) and the person’s **S**ocial self (cultural, spiritual, “life story”).

“Putting the P.I.E.C.E.S. Together” represents Physical, Intellectual, Emotional, Capabilities, Environment, Social, and are the cornerstones of the philosophy and care of the P.I.E.C.E.S. approach.

“Putting the P.I.E.C.E.S. Together” represents Physical, Intellectual, Emotional, Capabilities, Environment, Social, and are the cornerstones of the philosophy and care of the P.I.E.C.E.S. approach.

## Philosophy

The P.I.E.C.E.S. approach embodies a holistic and enabling philosophy:

- Person and relationship-centered, evidenced-based, and humanistic care are critical to well-being
- health is beyond the absence of disease, and includes quality of life, independence, and self-determination
- assessment and support are a continuous process from health promotion and disability prevention to early detection acute care and rehabilitation
- support, assessment and care responds to an individual’s complex changing and evolving needs i.e. chronic disease (from pre diagnosis including health promotion to end of life care
- care and service should be available, whenever possible, where the person resides and relocation should be avoided

The P.I.E.C.E.S. approach provides:

- a common set of values
- a common language for communicating across the system
- a common yet comprehensive approach for thinking through problems to enhance the capacity of those providing care, services, and support to older adults with complex physical and cognitive/mental needs and associated behaviours

## What are the P.I.E.C.E.S. goals?

# 1. A Comprehensive and Best Practices Approach to Assessment and Care Planning

- The P.I.E.C.E.S. approach promotes the understanding of the older person with complex physical, cognitive/mental health needs and associated behavioural issues through a common vision, common language, and common approach.

2. Risk Management

- The P.I.E.C.E.S. approach provides an effective means for detecting and preventing risk and for the identification of strategies to address risk management issues.

# 3. Implementation of Current and Emerging Best Practices

- The P.I.E.C.E.S. approach provides strategies that enable the person, family, caregivers, family physician, teams, organizations, and systems to share best practices and knowledge from various fields of study now and in the future. This continuous improvement approach includes health promotion and disability prevention.

# 4. Interdisciplinary Care

- The P.I.E.C.E.S. approach provides a practical way to promote and implement interdisciplinary care and shared solution-finding through its framework, complementary and supportive assessment tools and education. P.I.E.C.E.S. helps the team maximize health promotion and minimize unnecessary disability.

# 5. Integration and Collaborative Care (Shared Care)

- The P.I.E.C.E.S. approach provides strategies and tools to enhance communication, collaboration, and sharing of information and data at multiple levels. The approach will move us towards a collaborative shared care process pivotal to an interdisciplinary shared care which is the foundation for Primary Care Reform and Chronic Disease Management.

Integration & Collaborative Care

Comprehensive Assessment & Care Planning

Risk Management

**Person & Family**

InterdisciplinaryCare

Interdisciplinary

Care

Current & Emerging Best Practices

These five goals support the fundamental core value of the person and family at the centre and a team approach to assessment and care planning.

## P.I.E.C.E.S.: A Model for Collaborative Care and Changing Practice

2 complementary programs:

**P.I.E.C.E.S. Enabler Program for Senior Leaders**

**+**

**P.I.E.C.E.S. Education Programs for Professional Staff**

**=**

**Foundation for Changing Practice**

| **Enabler Program** | **P.I.E.C.E.S. Education programs** |
| --- | --- |
| The Enabler program is designed specifically for Senior Leaders who clear the path for the transfer of learning into day-to-day practices. Program includes strategies to :   - Understand P.I.E.C.E.S. framework and tools - Flag gaps between current performance and best practices within the organization - Interact with staff to select most appropriate P.I.E.C.E.S. candidates and develop implementation plan - Reflect on past experiences with training programs and explore the latest approaches to learning & development and performance improvement - Support change efforts in short and longer term - Engage team in collaborative improvement efforts | Each program is designed specifically to develop the in-house P.I.E.C.E.S. resource person and interdisciplinary teams. Through cased-based learning, assignments, and networking, the program provides in-depth learning that includes:   - Understanding and application of the P.I.E.C.E.S. framework and assessment tools - Range of strategies for interacting with the person and family - Exploring the need for reflective practice - Reporting strategies to enhance team communication - Supportive care strategies for the person and family - Shared team problem-solving method and tool for dialogue |

**Together these programs provide the foundation for a**

**common vision, common language,**

**and common approach.**

| Meaningful change to continually improve care and services for the person and family requires dialogue, partnerships, and best practices. |
| --- |

## Target Audience

The P.I.E.C.E.S. education programs are specifically designed for use by Regulated Health Professionals. The program is offered to staff who have responsibility for providing care to persons with Alzheimer Disease and related dementias as well as other mental health and associated behaviour problems.

**Please note**, this program is designed specifically for those with an active role in the day-to-day assessment, planning, and delivery of direct care. You will find it helpful to carefully review the performance objectives in this guide.

A complementary P.I.E.C.E.S. “Enabler” program designed specifically for Directors of Nursing/Care and Education Specialists (who are not involved in the day-to-day assessment, planning, and delivery of direct care) provides a practical approach for senior leaders to move from education to effective change at the point of care. For more information about P.I.E.C.E.S. “Enabler” see next page. Also visit [www.piecescanada.com](http://www.piecescanada.com/)

######

P.I.E.C.E.S.is not a train-the-trainer program; rather it is a comprehensive strategy to develop the role of the In-house Psychogeriatric Resource Person to serve as a resource to other team members. In addition to senior management support, the In-house Psychogeriatric Resource Person receives support and encouragement from others including the in-house training department, clinical nurse specialist, and/or external resources such as preceptors, the Psychogeriatric Resource Consultants, the Alzheimer Society and their Public Education Coordinators, and Specialized Outreach teams among others when they return to work to:

- assess how team members are currently managing the cognitive/mental health needs and associated behavioural issues of persons
- determine how those practices compare to what was learned through participation in the P.I.E.C.E.S. education program
- set realistic goals for improving day-to-day practices
- develop practical strategies for imparting new knowledge and skills learned through participation in the P.I.E.C.E.S. education program
- develop strategies to encourage integration of new practices on a day-to-day basis
- evaluate improvements over time

The P.I.E.C.E.S.™ Education Program:

All P.I.E.C.E.S. programs are built on four foundational concepts:

1. Systems support and development
2. Organization support and development
3. Service provider learning and development
4. Evaluation and continuous performance improvement

This resource guide avoids duplication of the excellent resources already available. Additional resources are posted on the P.I.E.C.E.S. website as made available. Please visit www.piecescanada.com . This guide strives to be concise and practical and is by no means an all-inclusive reference for all of an individual’s physical and cognitive/mental health needs and associated behaviours.

- P.I.E.C.E.S. education is based on current knowledge of adult learning concepts and performance improvement, ongoing evaluations, and ongoing experiences with the program.
- The program is case-based and depends upon the active participation and sharing of experiences by all attendees.
- The program promotes a learning-through-dialogue approach and minimizes lecture time; it encourages small group work and information exchanges.
- Participants learn how to systematically think through complex situations and have plenty of opportunity to test out their new skills during class and through workplace assignments.
- Members of the P.I.E.C.E.S. Educator Team are highly skilled clinicians and experienced facilitators. They are closely networked to continually share their learning and to improve the program.

## Support and Sustainability

The Psychogeriatric Resource Consultants (PRCs) across the Province of Ontario are in place to support the In-House Psychogeriatric Resource Person(s) in terms of ongoing learning strategies. PRCs have three roles serving as educators, consultants, and program developers.

Outreach and Specialty Services across the province are also available to coach the In-house Psychogeriatric Resource Person(s) with complex clinical situations.

Other support in the system include, among others, the local Alzheimer Society chapters and their Public Education Coordinators and the P.I.E.C.E.S. Consult Group.

## Technology

The impact of advancing technologies has been positive allowing all the various partners to connect, share, and learn together very quickly!

The website for the P.I.E.C.E.S. initiative is [www.piecescanada.com](http://www.piecescanada.com/). Please visit this site to view the wide range of materials, partners in care, and the Timely Information P.I.E.C.E.S. Service (TIPS – a searchable data base consisting of practical strategies in response to questions submitted by P.I.E.C.E.S. learners).

## Leadership Responsibilities

Each member of the in-house Psychogeriatric Resource Team will make a commitment to this educational program and must be open and willing to learn in new ways and to study and practice new assessment and intervention skills. They will also share knowledge and skills obtained through participation in the P.I.E.C.E.S. program with others in the organization.

Leadership support is critical to the success of the In-house Psychogeriatric Resource Person and includes factors such as:

- identifying the partnerships needed to help maximize the application (transfer) of new knowledge and skills into day-to-day practices
- creating a link between what is about to be learned through the P.I.E.C.E.S. and how the learner’s improved performance will impact on the quality of life for each individual
- identifying the opportunities for practicing what has been learned
- clarifying expectations for sharing new knowledge after the education program

To assist senior leaders in their efforts to continually support and encourage the development of their in-house resource person(s) an online Senior Management Guide to P.I.E.C.E.S. Implementation and Sustainability has been created and available at: [www.piecescanada.com](http://www.piecescanada.com/) . Also see Chapter in this guide entitled: “Enabling Practice Change – P.I.E.C.E.S. Development and Sustainability Strategies.

## Evaluation

Integration & Collaborative Care

Comprehensive Assessment & Care Planning

Risk Management

**Person & Family**

InterdisciplinaryCare

Interdisciplinary

Care

Current & Emerging Best Practices

The P.I.E.C.E.S. evaluation links to the program goals and includes evaluating:

- the implementation of P.I.E.C.E.S. education and its impacts on participants, persons with Alzheimer Disease and related dementias and other mental health and behavioural problems, and the caregiver and family
- support for reflective practice and sustained quality improvement in participating organizations
- factors that help and hinder implementation and sustained impact of such initiatives
- the benefit of the P.I.E.C.E.S. approach to enhancing collaboration, co-ordination across sectors, and in developing health care networks
- the impact of using technology to help coach and sustain P.I.E.C.E.S. education

## Core Competencies and Performance Objectives

The P.I.E.C.E.S. program focuses on the development of six core competencies to:

1. detect or flag cognitive/mental health needs and associated behavioural issues
2. use the P.I.E.C.E.S. templates to guide a systematic and comprehensive approach to complex issues
3. use the recommended tools to collect data
4. plan care with others (internal and external to the organization)
5. evaluate based on the goals developed through care planning
6. coach other staff using a practical tool to develop the above five competencies in others

## P.I.E.C.E.S. Performance Objectives

**Performance Objective #1:**

As a member of the organization’s Psychogeriatric Resource Team, the learner will demonstrate sensitivity and respect for the individuality of the person, family/caregiver and partners in care* to the extent she/he:

1. recognizes the impact of attitudes, behaviours, life experiences, values, thoughts, and feelings on well-being and quality of life, from the perspective of:

- self
- the person (resident/client)
- partners in care which includes the carer and family and the learner’s colleagues

1. serves as a role model and teacher, demonstrating practices consistent with (a) and:

- respect the individual as he/she attempts to deal with responses to challenges caused by the impairment/illness
- recognize and support a person’s worth, individuality, strengths, and abilities
- promote the active participation of the person in all aspects of the decision-making process recognizing the right of the person to take risks, refuse options, and make his/her own decisions according to mental capability and to the extent that this does not infringe upon the rights of another individual
- observe and describe the goals and evolving needs of the person and his/her carer and family
- plan and implement strategies with the interdisciplinary team to meet the goals of the person and his/her carer and family

1. evaluates performance and learning, with respect to impact of attitudes, behaviours, life experiences, values, thoughts, and feelings on well-being and quality of life, from the perspective of:

- self
- the person (resident/client)
- partners in care

* For the purpose of this Guide, *partners in care* is *an inclusive term* meaningcare team members *including* the person, the carer and family, the physician(s), the in-house psychogeriatric resource person(s), clergy, dietary, activation, volunteers, and so forth and also including support from external partners such as a Psychogeriatric Resource Consultant, the Alzheimer Society and Public Education Coordinators, and/or members of a Specialty Outreach Team.

## Performance Objective #2:

As a member of the organization’s Psychogeriatric Resource Team, the learner will complete an assessment to flag cognitive/mental health needs and associated behavioural issues to the extent she/he:

1. identifies the behaviour which could include:

- agitation and restlessness
- anxiety
- apathy/failure to participate; withdrawn/crying
- defensive behaviour
- hearing and seeing things that do not exist
- hoarding and/or rummaging
- impulsivity
- inappropriate sexual behaviour
- intrusiveness
- resistance to care
- suspicious/accusing others
- vocally disruptive behaviour
- wandering

1. identifies risk and the degree of risk
2. assesses and monitors behaviour using:

A: antecedents (triggering factors)

B: behaviour (severity, frequency, timing, and duration)

C: consequences (responses to behaviour)

- and/or the Cohen Mansfield Agitation Inventory and is aware of the Dementia Observation System as a resource tool

1. identifies and documents possible causes of behaviour related to **(P) physical** causes:

- queries delirium
- assesses functional problems including vision, hearing, bladder, and bowel
- assesses for pain and discomfort
- obtains information from person’s chart regarding medical history and status*
- notes signs and symptoms consistent with substance abuse
- is aware of the Confusion Assessment Method (C.A.M) as a resource tool
- lists all medications and monitors for effect on behaviour

1. identifies and documents possible causes of behaviour related to **(I)** **intellectual/cognitive** changes:

- administers cognitive assessment screening tools as appropriate
- records and documents criteria consistent with dementia
- notes symptoms of brain injury and other brain disorders
- obtains information regarding cognitive history and status*

1. identifies and documents possible causes of behaviour related to **(E**) **emotional/ psychiatric** health:

- administers Cornell Depression Scale
- obtains information regarding emotional history and status*
- notes signs and symptoms consistent with mood disorders
- notes signs and symptoms consistent with psychotic disorders (schizophrenia, paranoia, etc.)
- notes signs and symptoms consistent with various types of anxiety disorders (post traumatic stress disorder, etc.)

1. identifies and documents possible causes of behaviour related to changes in **(C)** **capabilities** related to aging or illness:

- is familiar with the Abilities Assessment Inventory
- obtains information relating to history and status of person’s capabilities*

1. identifies and documents possible causes of behaviour related to the **(E)** **environment:**

- obtains information relating to history and status of person’s environment*

1. identifies and documents possible causes of behaviour related to **(S)** **social** **and cultural factors**:

- obtains information relating to history, life story, and status of social factors*
- obtains information about and gains appreciation of family/caregiver needs and challenges; applies the P.I.E.C.E.S. framework to carer and family (**P**hysical health, **I**ntellectual health including understanding of illness, **E**motional health, **C**apabilities, **E**nvironment and **S**ocial factor)

1. recognizes and documents signs and symptoms of complex syndromes (i.e. the co-existence of two or more conditions)

(* Information may be obtained from the chart and team including carer and family)

**Performance Objective #3:**

As a member of the organization’s Psychogeriatric Resource Team, the learner will use assessment data related to cognitive/mental health needs and the associated behavioural issues to plan, implement, and evaluate care strategies to the extent she/he:

1. identifies risk and takes appropriate action in high risk situations
2. collaborates with the person and team, including carer and family, to develop a shared understanding of the person’s attempts to deal with challenges caused by the impairment/illness
3. identifies the communication patterns, values, cultural beliefs, coping styles, and learning aspirations/needs and modifies approach appropriately
4. networks with appropriate community resources to further the assessment and care planning (includes linking with Psychogeriatric Resource Consultants, Specialty Teams, Alzheimer Society and Public Education Coordinators)
5. establishes a system, with management and team, for observing and monitoring behaviour over time to evaluate the effects of non-drug and drug interventions, environmental changes, and care strategies
6. promotes dialogue1 in care conferences and team meetings so that assessment findings are explored and care issues and intervention options, including compatibility of strategies, are addressed
7. makes improvements/adjustments to care strategies in collaboration with the family/caregiver or Substitute Decision-Maker and team, based on evaluation
8. reflects on learning and shares experiences with others to enhance individual, team, and organizational knowledge about providing care to elders with cognitive/mental health needs and associated behavioural issues
9. demonstrates increased confidence in care planning

**1Dialogue:** The meaning of *dialogue*, comes from the Greek work "dia-logus" -- a free flowing of meaning through a group. It is conversation and listening with care. Dialogue allows the learner to discover (learn) insights perhaps not attainable individually; means to inquire, discover, hear, and understand multiple perspectives; contrasts with "discussion," which means a heaving back and forth of ideas, controversy, debate, feud, argument! (Senge, 1990)

**Performance Objective #4:**

As a member of the organization’s Psychogeriatric Resource Team, the learner will serve as a resource to others in planning care for the person with complex physical and cognitive/mental health needs and associated behavioural issues to the extent he or she:

1. works with management, the care team (including the carer and family), and community resources to recognize and clarify common myths of aging and societal values with respect to aging and mental illness
2. identifies the strengths, contributions, and expectations of the carer and family in the care of the person
3. documents symptoms and signs of stress in the team, including the carer and family, related to providing care to the person with cognitive/mental health needs and the associated behavioural issues
4. identifies areas in which the team including the carer and family require support or could provide support to others
5. collaborates with management and appropriate teams/committees/community resources to develop strategies and implementation plans to:

- decrease challenging behaviours and enhance well-being and the quality of life of the person
- identify and maximize the use of available resources
- develop confidence in care planning and care giving
- assist team members in identifying their own needs for safety and continuous learning
- define and facilitate resolution of critical incidents, thereby reducing subsequent stress
- defuse and review stressful incidents

1. works with management and other community resources to:

- identify areas requiring improvement in performance
- develop strategies to improve performance which could include formal and/or informal learning programs or packages
- develop strategies to integrate changes into day-to-day practice including strategies to coach the transfer of new skills and knowledge
- develop ways to evaluate strategies related to improved performances, transfer of learning, and change in practice

g) takes a collaborative team solution-finding approach to accomplish a – f

## Team and Collaborative Care

The P.I.E.C.E.S. approach promotes a collaborative team solution-finding approach by providing a framework for:

| **U**nderstanding | - Developing a shared an understanding of the person |
| --- | --- |
| **F**lagging | - Focusing observations on all aspects of the person |
| **I**nteraction | - Interacting as an individual caregiver, or as a team, with the person and his or her family/caregivers using the shared understanding of the person and the behaviour, as informed by the observations |
| **R**eporting and **R**eflecting | - Sharing what is observed and understood about the person with other members of the team and thinking about what those shared observations and understanding mean for interacting with the person |
| **S**upport | - Creating comprehensive supportive care strategies that reflect the shared understanding, observations and reflections of the team |
| **T**eam | - Celebrating the value of a consistent team approach |

Complementary to the P.I.E.C.E.S. program is the U-First! education program for unregulated staff and their supervisors. U-First! builds on the P.I.E.C.E.S. approach by encouraging the active participation of all partners in a collaborative team processes.

The P.I.E.C.E.S. program includes a practical tool to promote reflective thinking and the development of a common knowledge base, a common language, common values, and a common approach to providing care for persons with Alzheimer Disease and related dementias.

##
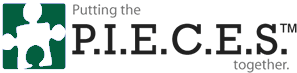


**A Model for Collaborative Care and Changing Practice; Summary of Key Elements**

Education in and of itself is not the answer to moving evidence to practice. Research and field experience from many bodies of study have identified critical elements that need to occur so that positive change and best practices can be realized. The four major interdependent elements and associated activities that enable positive change in day-to-day practices include:

+

- 1. The development of practical and proven learning strategies and tools
- P.I.E.C.E.S. provides a variety of learning options and practice opportunities; it takes advantage of advancing technologies to support learners. Formal processes for coaching learners are another important element of the P.I.E.C.E.S. education.
  1. Organizational support by senior leadership
- The P.I.E.C.E.S. approach includes providing senior leaders with education, practical strategies, and tools to help clear the path for the transfer of new skills and knowledge into day-to-day practices and to provide ongoing support to P.I.E.C.E.S. trained staff.

3. Systems support and community sustainability which include new ways in which communities deliver health care

- The P.I.E.C.E.S. approach promotes working in partnership with community and system leaders to shape supportive policy and service options and working with individuals whose major focus includes supporting the P.I.E.C.E.S. goals and improving collaboration with specialty resources.

4. Methods to evaluate and promote ongoing improvements

- P.I.E.C.E.S. evaluation is integral to each of its goals and each of the above elements; information and data comes from hands-on experience in the field and new and emerging evidence. Particular attention is paid to process evaluation given the goals of the programs (see page 3).

Best Practices. Evidence-based & practice-based

Effective Outcomes

**Common Vision**

| Learning & Development  P.I.E.C.E.S. Education  Person & Family | Organization Support &  Performance Improvement |
| --- | --- |
| Evaluation &  Improvement  **Common Language & Approach** | Systems Support  & Community  Development |

1. Department of Psychiatry and Behavioral Neurosciences, McMaster University [↑](#footnote-ref-2)
2. Geriatric Psychiatry Service, St. Joseph’s Healthcare, CMHS, Hamilton, Ontario. [↑](#footnote-ref-3)
3. School of Optometry, University of Waterloo [↑](#footnote-ref-4)
4. Lawson Health Research Institute, London, Ontario [↑](#footnote-ref-5)
5. Specialized Geriatric Services of Southwestern Ontario, St. Joseph’s Healthcare London [↑](#footnote-ref-6)
6. Aging, Rehabilitation & Geriatric Care Research Centre of the Lawson Health Research Institute, London, Ontario [↑](#footnote-ref-7)
7. Diane Harris and Associates, Learning and Performance Consultants [↑](#footnote-ref-8)
8. Division of Geriatric Psychiatry, Queens University, Kingston, Ontario [↑](#footnote-ref-9)
9. Geriatric Psychiatry Service, Providence Continuing Care Centre [↑](#footnote-ref-10)
